# Supplementary material for: The HER2-Encoded miR-4728-3p Regulates ESR1 through a Non-Canonical Internal Seed Interaction
Source: PubMed Central journal article supplement (PMC4020767; doi:10.1371/journal.pone.0097200), 2014-05-14
Supplement: pone.0097200.s001.pdf [file pone.0097200.s001.pdf]

| Target gene | Gene name                                                             | Conserved sites |      |         |         |
|-------------|-----------------------------------------------------------------------|-----------------|------|---------|---------|
|             |                                                                       | total           | 8mer | 7mer-m8 | 7mer-1A |
| SMG1        | PI-3-kinase-related kinase SMG-1                                      | 2               | 1    | 0       | 1       |
| SSR3        | signal sequence receptor, gamma (translocon-associated protein gamma) | 2               | 1    | 0       | 1       |
| TNNI1       | troponin I type 1 (skeletal, slow)                                    | 2               | 1    | 0       | 1       |
| APLN        | apelin                                                                | 1               | 1    | 0       | 0       |
| BCL11B      | B-cell CLL/lymphoma 11B (zinc finger protein)                         | 1               | 1    | 0       | 0       |
| C1orf43     | chromosome 1 open reading frame 43                                    | 1               | 1    | 0       | 0       |
| CNTNAP1     | contactin associated protein 1                                        | 1               | 1    | 0       | 0       |
| CRTC2       | CREB regulated transcription coactivator 2                            | 1               | 1    | 0       | 0       |
| CSF1R       | colony stimulating factor 1 receptor                                  | 1               | 1    | 0       | 0       |
| DDX54       | DEAD (Asp-Glu-Ala-Asp) box polypeptide 54                             | 1               | 1    | 0       | 0       |
| FLJ11151    | hypothetical protein FLJ11151                                         | 1               | 1    | 0       | 0       |
| GBA2        | glucosidase, beta (bile acid) 2                                       | 1               | 1    | 0       | 0       |
| GOSR1       | golgi SNAP receptor complex member 1                                  | 1               | 1    | 0       | 0       |
| IGF2        | insulin-like growth factor 2 (somatomedin A)                          | 1               | 1    | 0       | 0       |
| IKZF2       | IKAROS family zinc finger 2 (Helios)                                  | 1               | 1    | 0       | 0       |
| LEP         | leptin                                                                | 1               | 1    | 0       | 0       |
| LOXL3       | lysyl oxidase-like 3                                                  | 1               | 1    | 0       | 0       |
| MEOX1       | mesenchyme homeobox 1                                                 | 1               | 1    | 0       | 0       |
| MEX3A       | mex-3 homolog A (C. elegans)                                          | 1               | 1    | 0       | 0       |
| MPP2        | membrane protein, palmitoylated 2 (MAGUK p55 subfamily member 2)      | 1               | 1    | 0       | 0       |
| MRFAP1L1    | Morf4 family associated protein 1-like 1                              | 1               | 1    | 0       | 0       |
| MRPL11      | mitochondrial ribosomal protein L11                                   | 1               | 1    | 0       | 0       |
| MYADM       | myeloid-associated differentiation marker                             | 1               | 1    | 0       | 0       |
| OSM         | oncostatin M                                                          | 1               | 1    | 0       | 0       |
| PDLIM2      | PDZ and LIM domain 2 (mystique)                                       | 1               | 1    | 0       | 0       |
| PIB5PA      | phosphatidylinositol (4,5) bisphosphate 5-phosphatase, A              | 1               | 1    | 0       | 0       |
| PPP2R5D     | protein phosphatase 2, regulatory subunit B', delta isoform           | 1               | 1    | 0       | 0       |
| PURB        | purine-rich element binding protein B                                 | 1               | 1    | 0       | 0       |
| RAB11FIP1   | RAB11 family interacting protein 1 (class I)                          | 1               | 1    | 0       | 0       |
| RAG1        | recombination activating gene 1                                       | 1               | 1    | 0       | 0       |
| RP1L1       | retinitis pigmentosa 1-like 1                                         | 1               | 1    | 0       | 0       |

|             |                                                                   |   |   |   |   |
|-------------|-------------------------------------------------------------------|---|---|---|---|
| SCRT2       | scratch homolog 2, zinc finger protein (Drosophila)               | 1 | 1 | 0 | 0 |
| SEMA3E      | sema domain, immunoglobulin domain (Ig), (semaphorin) 3E          | 1 | 1 | 0 | 0 |
| SETX        | senataxin                                                         | 1 | 1 | 0 | 0 |
| SLC30A3     | solute carrier family 30 (zinc transporter), member 3             | 1 | 1 | 0 | 0 |
| SLC30A8     | solute carrier family 30 (zinc transporter), member 8             | 1 | 1 | 0 | 0 |
| SLC39A10    | solute carrier family 39 (zinc transporter), member 10            | 1 | 1 | 0 | 0 |
| SMURF1      | SMAD specific E3 ubiquitin protein ligase 1                       | 1 | 1 | 0 | 0 |
| SUSD1       | sushi domain containing 1                                         | 1 | 1 | 0 | 0 |
| TLR4        | toll-like receptor 4                                              | 1 | 1 | 0 | 0 |
| TNPO1       | transportin 1                                                     | 1 | 1 | 0 | 0 |
| USP1        | ubiquitin specific peptidase 1                                    | 1 | 1 | 0 | 0 |
| ZNF24       | zinc finger protein 24                                            | 1 | 1 | 0 | 0 |
| ZNF592      | zinc finger protein 592                                           | 1 | 1 | 0 | 0 |
| ZNF629      | zinc finger protein 629                                           | 1 | 1 | 0 | 0 |
| ATRN        | attractin                                                         | 1 | 0 | 1 | 0 |
| BTG1        | B-cell translocation gene 1, anti-proliferative                   | 1 | 0 | 1 | 0 |
| CALN1       | calneuron 1                                                       | 1 | 0 | 1 | 0 |
| CD28        | CD28 molecule                                                     | 1 | 0 | 1 | 0 |
| DYRK1A      | dual-specificity tyrosine-(Y)-phosphorylation regulated kinase 1A | 1 | 0 | 1 | 0 |
| FZD4        | frizzled homolog 4 (Drosophila)                                   | 1 | 0 | 1 | 0 |
| GABRE       | gamma-aminobutyric acid (GABA) A receptor, epsilon                | 1 | 0 | 1 | 0 |
| IMPDH1      | IMP (inosine monophosphate) dehydrogenase 1                       | 1 | 0 | 1 | 0 |
| KCNE3       | potassium voltage-gated channel, Isk-related family, member 3     | 1 | 0 | 1 | 0 |
| KRT76       | keratin 76                                                        | 1 | 0 | 1 | 0 |
| MARK4       | MAP/microtubule affinity-regulating kinase 4                      | 1 | 0 | 1 | 0 |
| NAV1        | neuron navigator 1                                                | 1 | 0 | 1 | 0 |
| PBX1        | pre-B-cell leukemia homeobox 1                                    | 1 | 0 | 1 | 0 |
| SDC1        | syndecan 1                                                        | 1 | 0 | 1 | 0 |
| SLC45A3     | solute carrier family 45, member 3                                | 1 | 0 | 1 | 0 |
| SUV39H1     | suppressor of variegation 3-9 homolog 1 (Drosophila)              | 1 | 0 | 1 | 0 |
| TERF2       | telomeric repeat binding factor 2                                 | 1 | 0 | 1 | 0 |
| TMEM132B    | transmembrane protein 132B                                        | 1 | 0 | 1 | 0 |
| <b>ESR1</b> | <b>estrogen receptor 1</b>                                        | 1 | 0 | 0 | 1 |

|           |                                                                   |   |   |   |   |
|-----------|-------------------------------------------------------------------|---|---|---|---|
| ARFIP2    | ADP-ribosylation factor interacting protein 2 (arfaptin 2)        | 1 | 0 | 0 | 1 |
| C10orf104 | chromosome 10 open reading frame 104                              | 1 | 0 | 0 | 1 |
| C15orf55  | chromosome 15 open reading frame 55                               | 1 | 0 | 0 | 1 |
| C3orf10   | chromosome 3 open reading frame 10                                | 1 | 0 | 0 | 1 |
| CALCR     | calcitonin receptor                                               | 1 | 0 | 0 | 1 |
| CNNM3     | cyclin M3                                                         | 1 | 0 | 0 | 1 |
| DDX3X     | DEAD (Asp-Glu-Ala-Asp) box polypeptide 3, X-linked                | 1 | 0 | 0 | 1 |
| DENND1A   | DENN/MADD domain containing 1A                                    | 1 | 0 | 0 | 1 |
| EIF5A2    | eukaryotic translation initiation factor 5A2                      | 1 | 0 | 0 | 1 |
| ELMO2     | engulfment and cell motility 2                                    | 1 | 0 | 0 | 1 |
| FOXA1     | forkhead box A1                                                   | 1 | 0 | 0 | 1 |
| GATAD2B   | GATA zinc finger domain containing 2B                             | 1 | 0 | 0 | 1 |
| ITCH      | itchy E3 ubiquitin protein ligase homolog (mouse)                 | 1 | 0 | 0 | 1 |
| LIMD1     | LIM domains containing 1                                          | 1 | 0 | 0 | 1 |
| LYRM1     | LYR motif containing 1                                            | 1 | 0 | 0 | 1 |
| MRFAP1    | Mof4 family associated protein 1                                  | 1 | 0 | 0 | 1 |
| NPTXR     | neuronal pentraxin receptor                                       | 1 | 0 | 0 | 1 |
| ORMDL3    | ORM1-like 3 ( <i>S. cerevisiae</i> )                              | 1 | 0 | 0 | 1 |
| PIP4K2B   | phosphatidylinositol-5-phosphate 4-kinase, type II, beta          | 1 | 0 | 0 | 1 |
| PLAGL2    | pleiomorphic adenoma gene-like 2                                  | 1 | 0 | 0 | 1 |
| PLEKHH3   | pleckstrin homology domain containing, family H member 3          | 1 | 0 | 0 | 1 |
| PML       | promyelocytic leukemia                                            | 1 | 0 | 0 | 1 |
| RAB6A     | RAB6A, member RAS oncogene family                                 | 1 | 0 | 0 | 1 |
| RC3H1     | ring finger and CCCH-type zinc finger domains 1                   | 1 | 0 | 0 | 1 |
| RECQL5    | RecQ protein-like 5                                               | 1 | 0 | 0 | 1 |
| SH3PXD2A  | SH3 and PX domains 2A                                             | 1 | 0 | 0 | 1 |
| SH3TC2    | SH3 domain and tetratricopeptide repeats 2                        | 1 | 0 | 0 | 1 |
| SHANK2    | SH3 and multiple ankyrin repeat domains 2                         | 1 | 0 | 0 | 1 |
| SLC10A7   | solute carrier family 10, member 7                                | 1 | 0 | 0 | 1 |
| SLC5A12   | solute carrier family 5 (sodium/glucose cotransporter), member 12 | 1 | 0 | 0 | 1 |
| SMYD3     | SET and MYND domain containing 3                                  | 1 | 0 | 0 | 1 |
| SNX27     | sorting nexin family member 27                                    | 1 | 0 | 0 | 1 |
| SRGAP3    | SLIT-ROBO Rho GTPase activating protein 3                         | 1 | 0 | 0 | 1 |

|         |                                                                                 |   |   |   |   |
|---------|---------------------------------------------------------------------------------|---|---|---|---|
| STK4    | serine/threonine kinase 4                                                       | 1 | 0 | 0 | 1 |
| SYNGR1  | synaptogyrin 1                                                                  | 1 | 0 | 0 | 1 |
| SYS1    | SYS1 Golgi-localized integral membrane protein homolog ( <i>S. cerevisiae</i> ) | 1 | 0 | 0 | 1 |
| TNFAIP1 | tumor necrosis factor, alpha-induced protein 1 (endothelial)                    | 1 | 0 | 0 | 1 |
| XPO4    | exportin 4                                                                      | 1 | 0 | 0 | 1 |
| ZDHHC16 | zinc finger, DHHC-type containing 16                                            | 1 | 0 | 0 | 1 |
| ZNF648  | zinc finger protein 648                                                         | 1 | 0 | 0 | 1 |
