# Supplementary material for: The HER2-Encoded miR-4728-3p Regulates ESR1 through a Non-Canonical Internal Seed Interaction
Source: PubMed Central journal article supplement (PMC4020767; doi:10.1371/journal.pone.0097200), 2014-05-14
Supplement: pone.0097200.s002.pdf [file pone.0097200.s002.pdf]

**primer name target gene**

|                  |                                                             |                                     |
|------------------|-------------------------------------------------------------|-------------------------------------|
| ACTB.F           | Actin                                                       | GATGACCCAGATCATGTTTGAG              |
| ACTB.R           | Actin                                                       | CTGGATAGCAACGTACATGG                |
| RN7SL.R          | Homo sapiens RNA, 7SL, cytoplasmic                          | CAGGTCCAGTTTTTTTTTTTTTTAGAGACG      |
| RN7SL.F          | Homo sapiens RNA, 7SL, cytoplasmic                          | GAATAGCCACTGCACTCCAG                |
| RNU6.R           | Homo sapiens RNA, U6 small nuclear                          | CAGGTCCAGTTTTTTTTTTTTTTAAAAATATGGAA |
| RNU6.F           | Homo sapiens RNA, U6 small nuclear                          | CGCAAGGATGACACGCAAATTC              |
| SNORD48.F        | Homo sapiens small nucleolar RNA, C/D box 48                | GTGATGATGACCCAGGTAACTC              |
| SNORD48.R        | Homo sapiens small nucleolar RNA, C/D box 48                | CAGGTCCAGTTTTTTTTTTTTTTGGTCAGA      |
| let7a.F          | hsa-let-7a                                                  | GCAGTGAGGTAGTAGGTTGT                |
| let7a.R          | hsa-let-7a                                                  | GGTCCAGTTTTTTTTTTTTTTAACTATAC       |
| miR.191.5p.F     | hsa-miR-191 5p                                              | CGCAGCAACGGAATCCCAA                 |
| miR.191.5p.R     | hsa-miR-191 5p                                              | AGGTCCAGTTTTTTTTTTTTTTTTCAGCTGCT    |
| ESR1.ex.1.2.F    | Estrogen receptor alpha exon junction 1-2                   | GCATTCTACAGGCCAAATTCA               |
| ESR1.ex.1.2.R    | Estrogen receptor alpha exon junction 1-2                   | ACTGGCCAATCTTTCTCTGC                |
| ESR1.ex.7.8.F    | Estrogen receptor alpha exon junction 7-8                   | CCTCATCCTCTCCCACATCA                |
| ESR1.ex.7.8.R    | Estrogen receptor alpha exon junction 7-8                   | AGATGCTCCATGCCTTTGTT                |
| ESR1.3UTR.F      | Estrogen receptor alpha 3' UTR                              | ACACAGACCCCTTTGCATT                 |
| ESR1.3UTR.R      | Estrogen receptor alpha 3' UTR                              | TGTAGTGCACAAAAAGCATTG               |
| ERBB2.exon2.3.F  | Receptor tyrosine-protein kinase erbB-2 exon junction 2-3   | GTCCTTCTGCAGGATATCCA                |
| ERBB2.exon2.3.R  | Receptor tyrosine-protein kinase erbB-2 exon junction 2-3   | CACTTGTTGTGAGCGATGAG                |
| ERBB2.ex.23.24.F | Receptor tyrosine-protein kinase erbB-2 exon junction 23-24 | CCCATCTGCACCATTGATGTC               |
| ERBB2.ex.23.24.R | Receptor tyrosine-protein kinase erbB-2 exon junction 23-24 | GAGTCAATCATCCAACATTTGACC            |
